# Supplementary material for: Measurement report: High Contributions of Halohydrocarbon and Aromatic Compounds to Emissions and Chemistry of Atmospheric VOCs in Industrial Area
Source: Copernicus journal article supplement (doi:10.5194/acp-2021-280), 2021-05-05
Supplement: Supplementary file [file acp-2021-280-AC1-supplement.pdf]

We would like to thank the anonymous Referee #1 who gave his/her time to provide the comments. First of all, the manuscript is a “measurement report” which presents substantial new results on atmospheric VOCs observed in one of the most important industrial areas in China. It is not a “Research articles” type manuscript. Secondly, the objective of the study/manuscript was not to report the process-specific/industry-specific VOC emissions, the objective was to present the characteristics of VOCs in an industry affected area. There have been many process-specific/industry-specific VOC emissions studies already performed (e.g. Mo et al., 2015; Zhang et al., 2017; Yan et al., 2016; Shi et al., 2015).

## References

- Mo, Z., Shao, M., Lu, S., Qu, H., Zhou, M., Sun, J., & Gou, B. (2015). Process-specific emission characteristics of volatile organic compounds ( VOCs ) from petrochemical facilities in the Yangtze River Delta , China. *Science of the Total Environment*, 533, 422–431. <https://doi.org/10.1016/j.scitotenv.2015.06.089>
- Shi, J., Deng, H., Bai, Z., Kong, S., Wang, X., Hao, J., ... Ning, P. (2015). Emission and profile characteristic of volatile organic compounds emitted from coke production, iron smelt, heating station and power plant in Liaoning Province, China. *Science of the Total Environment*, 515–516(x), 101–108. <https://doi.org/10.1016/j.scitotenv.2015.02.034>
- Yan, Y., Yang, C., Peng, L., Li, R., & Bai, H. (2016). Emission characteristics of volatile organic compounds from coal-, coal gangue-, and biomass-fired power plants in China. *Atmospheric Environment*, 143, 261–269. <https://doi.org/10.1016/j.atmosenv.2016.08.052>
- Zhang, Z., Wang, H., Chen, D., Li, Q., Thai, P., Gong, D., ... Wang, B. (2017). Emission characteristics of volatile organic compounds and their secondary organic aerosol formation potentials from a petroleum re fi nery in Pearl River Delta , China. *Science of the Total Environment*, 584–585, 1162–1174. <https://doi.org/10.1016/j.scitotenv.2017.01.179>
